# Supplementary material for: A preanodized 6B-pencil graphite as an efficient electrochemical sensor for mono-phenolic preservatives (phenol and meta-cresol) in insulin formulations
Source: Royal Society of Chemistry journal article supplement (doi:10.1039/c4ay02798a), 2015-01-01
Supplement: c4ay02798a1.pdf [file c4ay02798a1.pdf]

Electronic Supplementary Information†

**A preanodized 6B pencil graphite as an efficient electrochemical sensor for  
mono-phenolic preservatives (phenol and *meta*-cresol) in insulin  
formulations†**

Nandimalla Vishnu and Annamalai Senthil Kumar\*

*<sup>a</sup>Environmental and Analytical Chemistry Division, School of Advanced Sciences,  
Vellore Institute of Technology University, Vellore-632014, India*

*\*Corresponding author's Fax: +91 416 2243092; Tel: +91 -416- 2202754;  
E-mail: askumarchem@yahoo.com*

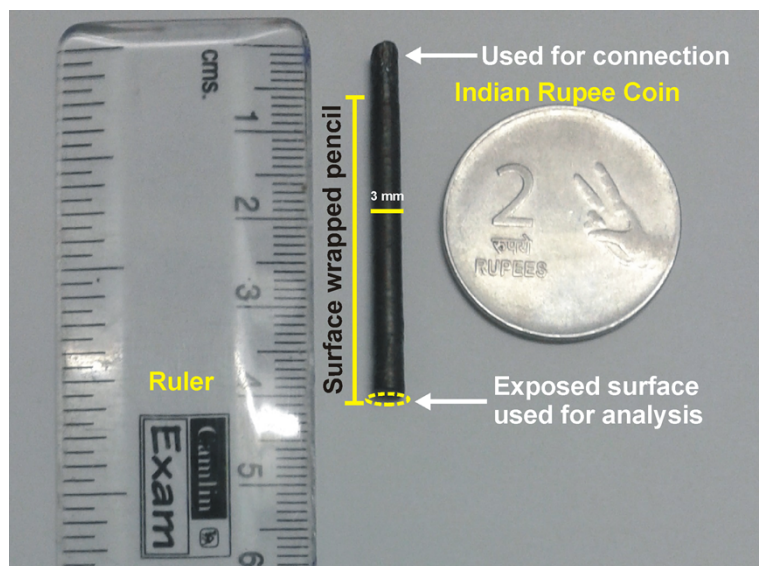

**Fig. S1** Parafilm wrapped 6B-pencil graphite (6B-PGE\*) used as working electrode in this work.

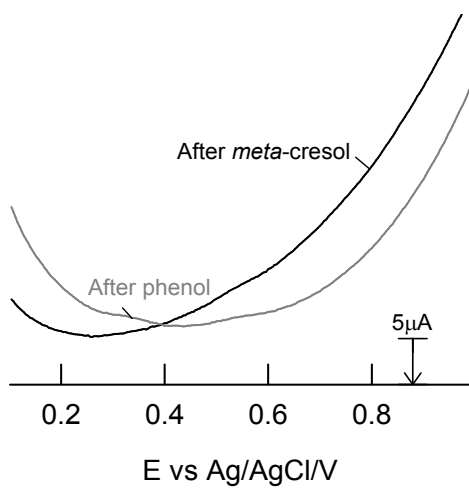

**Fig. S2** DPV responses of *meta*-cresol and phenol exposed 6B-PGE\* (Fig. 1C) in a blank pH 7 PBS. Other conditions as in Fig. 1
